# Supplementary material for: Single-particle mass analysis of intact ribosomes by mass photometry and Orbitrap-based charge detection mass spectrometry
Source: PubMed Central journal article supplement (PMC8529500; doi:10.1016/j.isci.2021.103211), 2021-10-02
Supplement: mmc1.pdf [file mmc1.pdf]

**iScience, Volume 24**

**Supplemental information**

**Single-particle mass analysis of intact ribosomes  
by mass photometry and Orbitrap-based  
charge detection mass spectrometry**

**Szu-Hsueh Lai, Sem Tamara, and Albert J.R. Heck**

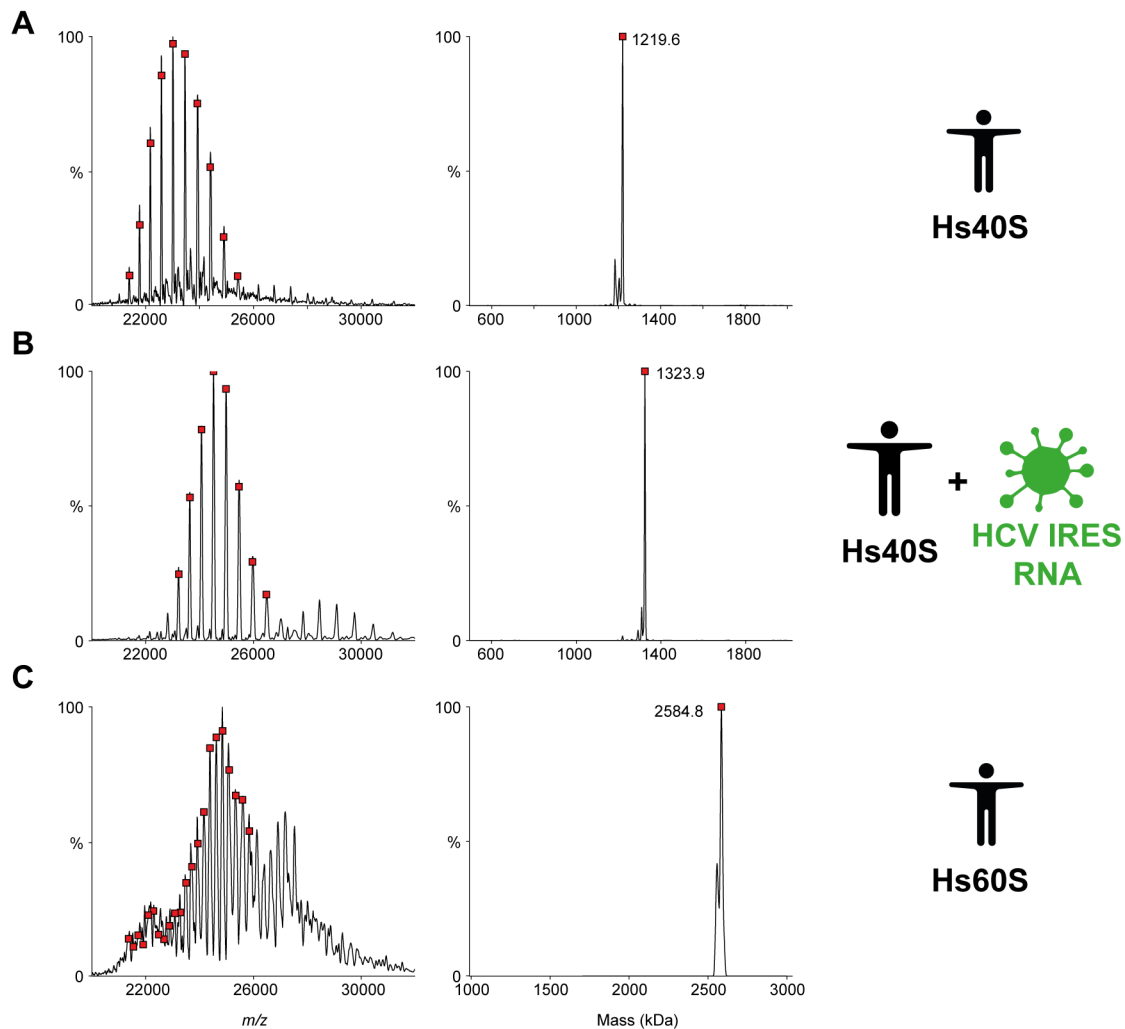

**Figure S1. High-resolution native MS spectra of cytosolic ribosomal samples purified from human cells, related to Table 1.**

Raw native mass spectra (left) and zero-charge deconvoluted mass spectra (right) of (A) Hs40S, (B) Hs40S in a complex with HCV IRES RNA, and (C) Hs60S ribosomal particles. Native mass spectra for (A) and (B) were acquired by spraying the samples from the solvent containing 25 mM triethylammonium acetate to facilitate stabilization and charge-reduction during high-energy desolvation (300 V HCD energy) on the Orbitrap UHMR mass spectrometer. Peaks corresponding to the major mass peak in each spectrum are annotated with red squares. Cartoons on the right are used to guide the eye of the reader.

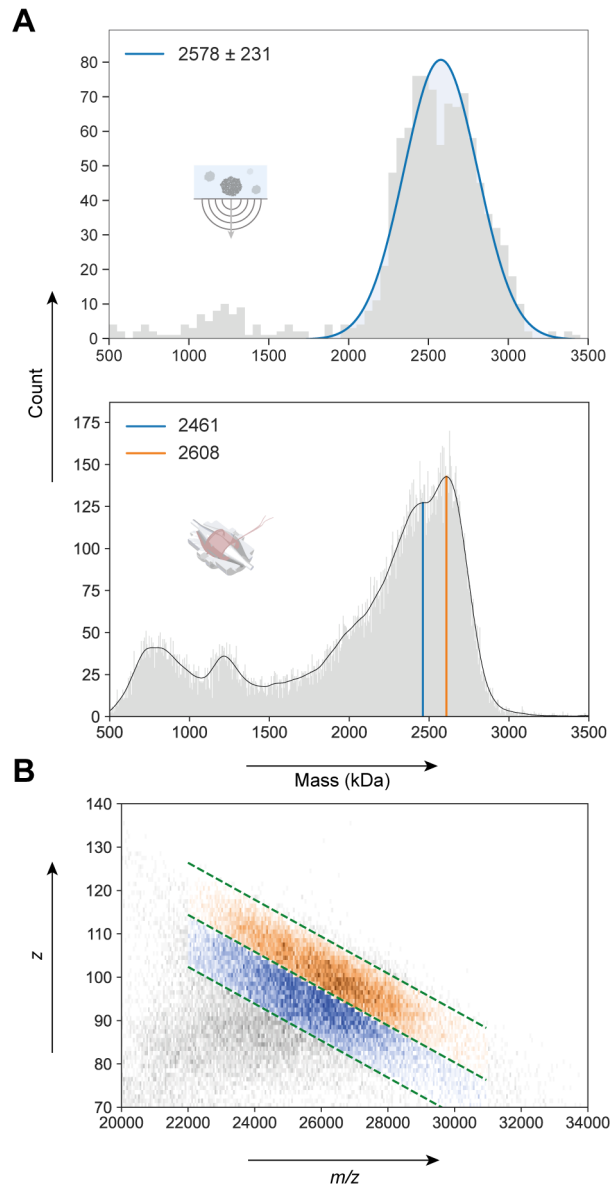

**Figure S2. Single-particle analysis of Hs60S ribosomal particles by MP and CDMS, related to Figure 2.**

(A) Mass distribution histograms obtained for the individually purified Hs60S sample using MP (top) and CDMS (bottom). The fitted mean mass and standard deviation of the most abundant species are provided for MP, while for CDMS the kernel density estimation is calculated and drawn over the mass distribution histogram with local maxima indicated in the mass range close to the theoretical mass of the Hs60S ribosomal subunit (2633 kDa).

(B) 2D-histogram representation of the Hs60S sample obtained by using CDMS. Color-coding is identical to the maxima annotation in (A).

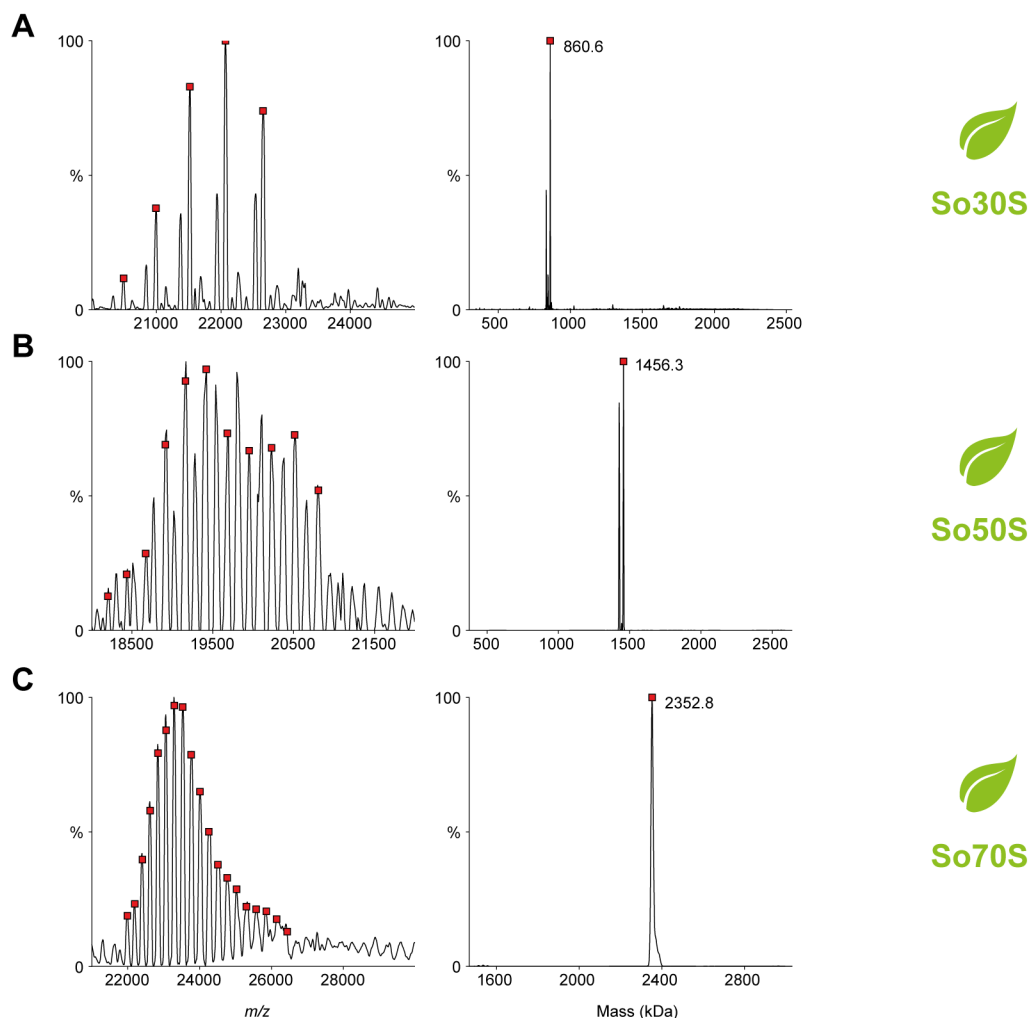

**Figure S3. High-resolution native MS spectra of ribosomal samples purified from spinach chloroplasts, related to Table 1.**

Raw native mass spectra (left) and zero-charge deconvoluted mass spectra (right) for (A) So30S, (B) So50S, and (C) So70S chloroplast ribosomal particles. Each spectrum was acquired by performing quadrupole isolation of the region of interest and the samples were sprayed from a solution either containing a (A,B) low concentration (0.5 mM) or (C) high concentration of  $Mg^{2+}$  (~5 mM). So30S ribosomal particles (A) were sprayed from a solvent containing 25 mM triethylammonium acetate to facilitate stabilization during high-energy desolvation (300 V HCD energy) on the Orbitrap UHMR mass spectrometer. Peaks corresponding to the major mass peak in each spectrum are annotated with red squares. Cartoons on the right are used to guide the eye of the reader.

**Table S1. Theoretical and experimental masses of protein and rRNA subunits constituting the Hs40S ribosomal particles, related to Table 1.**

Experimental masses were previously determined through top-down LC-MS/MS analysis as reported by Van de Waterbeemd et al. (Van De Waterbeemd et al., 2018)

| Protein name | Uniprot Accession | Theoretical average mass (Da) | Experimental average mass (Da) |
|--------------|-------------------|-------------------------------|--------------------------------|
| RS2          | P15880            | 31193.23                      | 31542.55                       |
| RS3          | P23396            | 26557.12                      | 26597.99                       |
| RS3A         | P61247            | 29813.72                      | 29812.36                       |
| RS4X         | P62701            | 29466.53                      | 29465.17                       |
| RS5          | P46782            | 22876.4                       | 22786.18                       |
| RS6          | P62753            | 28680.64                      | 28679.61                       |
| RS7          | P62081            | 22126.85                      | 22167.87                       |
| RS8          | P62241            | 24073.99                      | 24072.73                       |
| RS9          | P46781            | 22460.24                      | 22459.18                       |
| RS10         | P46783            | 18897.77                      | 18952.81                       |
| RS11         | P62280            | 18299.53                      | 18340.5                        |
| RS12         | P25398            | 14383.74                      | 14424.37                       |
| RS13         | P62277            | 17091.11                      | 17090.06                       |
| RS14         | P62263            | 16141.51                      | 16140.58                       |
| RS15         | P62841            | 16908.91                      | 16949.93                       |
| RS15A        | P62244            | 14708.32                      | 14707.24                       |
| RS16         | P62249            | 16314.12                      | 16313.1                        |
| RS17         | P08708            | 15418.93                      | 15418.1                        |
| RS18         | P62269            | 17587.48                      | 17628.57                       |
| RS19         | P39019            | 15929.31                      | 15928.37                       |
| RS20         | P60866            | 13241.52                      | 13282.51                       |
| RS21         | P63220            | 9111.38                       | 9152.45                        |
| RS23         | P62266            | 15676.36                      | 15691.28                       |
| RS24         | P62847            | 15423.19                      | 15465.56                       |
| RS25         | P62851            | 13742.13                      | 13638.96                       |
| RS26         | P62854            | 12884.23                      | 12883.21                       |
| RS27         | P42677            | 9329.93                       | 9370.82                        |
| RS27A        | P62979            | 9418.09                       | 9416.49                        |
| RS28         | P62857            | 7841.03                       | 7881.99                        |
| RS29         | P62273            | 6545.57                       | 6543.22                        |
| RS30         | P62861            | 6647.86                       | 6646.6                         |
| RSSA         | P08865            | 32722.88                      | 32763.64                       |
| RACK1        | P63244            | 35076.73                      | 34986.53                       |
| RL41         | P62945            | 3456.35                       | 3456.35                        |
| 18S rRNA     |                   | 603011.80                     |                                |
| $\Sigma$     |                   |                               | <b>1213669</b>                 |

**Table S2. Theoretical and experimental masses of protein and rRNA subunits constituting Hs60S ribosomal particles, related to Table 1.**

Experimental masses were previously determined through top-down LC-MS/MS analysis as reported by Van de Waterbeemd et al. (Van De Waterbeemd et al., 2018)

| Protein name | Uniprot Accession | Theoretical average mass (Da) | Experimental average mass (Da) |
|--------------|-------------------|-------------------------------|--------------------------------|
| RL10         | P27635            | 24472.7                       | 24444.25                       |
| RL10A        | P62906            | 24700.12                      | 24740.89                       |
| RL11         | P62913            | 20121.19                      | 20162.35                       |
| RL12         | P30050            | 17818.59                      | 17817.19                       |
| RL13         | P26373            | 24261.48                      | 24129.27                       |
| RL13A        | P40429            | 23446.05                      | 23486.94                       |
| RL14         | P50914            | 23300.65                      | 23655.58                       |
| RL15         | P61313            | 24014.88                      | 24013.7                        |
| RL17         | P18621            | 21265.83                      | 21264.79                       |
| RL18         | Q07020            | 21503.3                       | 21502.17                       |
| RL18A        | Q02543            | 20762.36                      | 20761.16                       |
| RL19         | P84098            | 23465.97                      | 23375.67                       |
| RL21         | P46778            | 18433.64                      | 18434.31                       |
| RL22         | P35268            | 14655.8                       | 14654.79                       |
| RL23         | P62829            | 14865.44                      | 14775.22                       |
| RL23A        | P62750            | 17563.87                      | 17604.92                       |
| RL24         | P83731            | 17778.96                      | 17778.24                       |
| RL26         | P61254            | 17258.21                      | 17256.96                       |
| RL27         | P61353            | 15797.72                      | 15707.54                       |
| RL27A        | P46776            | 16430.19                      | 16445.29                       |
| RL28         | P46779            | 15616.31                      | 15657.41                       |
| RL29         | P47914            | 17620.88                      | 17621.87                       |
| RL3          | P39023            | 45977.7                       | 45990.17                       |
| RL30         | P62888            | 12784.05                      | 12651.72                       |
| RL31         | P62899            | 14462.86                      | 14461.25                       |
| RL32         | P62910            | 15728.61                      | 15727.51                       |
| RL34         | P49207            | 13161.76                      | 13158.66                       |
| RL35         | P42766            | 14420.28                      | 14419.27                       |
| RL35A        | P18077            | 12537.67                      | 12447.52                       |
| RL36         | Q9Y3U8            | 12122.51                      | 12121.41                       |
| RL36A        | P83881            | 12440.82                      | 12320.88                       |
| RL37         | P61927            | 10946.69                      | 10943.54                       |
| RL37A        | P61513            | 10144.06                      | 10142.02                       |
| RL38         | P63173            | 8086.7                        | 8085.55                        |
| RL39         | P62891            | 6275.49                       | 6274.08                        |

| Protein name | Uniprot Accession | Theoretical average mass<br>(Da) | Experimental average mass<br>(Da) |
|--------------|-------------------|----------------------------------|-----------------------------------|
| RL4          | P36578            | 47566.14                         | 47606.94                          |
| RL40         | P62987            | 6181.49                          | 6221.76                           |
| RL41         | P62945            | 3456.35                          | 3456.16                           |
| RL5          | P46777            | 34231.43                         | 34229.8                           |
| RL6          | Q02878            | 32596.73                         | 32595.71                          |
| RL7          | P18124            | 29225.77                         | 29266.69                          |
| RL7A         | P62424            | 29864.43                         | 29863.07                          |
| RL8          | P62917            | 27893.46                         | 27908.29                          |
| RL9          | P32969            | 21863.41                         | 21862.33                          |
| RLA0         | P05388            | 34273.51                         | 34141.31                          |
| RLA1         | P05386            | 11382.74                         | 11423.76                          |
| RLA2         | P05387            | 11664.94                         | 11663.94                          |
| 28S rRNA     |                   | 1629202.4                        |                                   |
| 5S rRNA      |                   | 38763                            |                                   |
| 5.8S rRNA    |                   | 50654.1                          |                                   |
| $\Sigma$     |                   |                                  | <b>2632893</b>                    |

**Table S3. Theoretical and experimental masses of protein and rRNA subunits constituting So30S ribosomal particles, related to Table 1.**

Experimental masses were previously determined through top-down LC-MS/MS analysis as reported by Van de Waterbeemd et al. (Van De Waterbeemd et al., 2018)

| Protein name | Theoretical average mass (Da) | Experimental average mass (Da) |
|--------------|-------------------------------|--------------------------------|
| pY           | 26805.2606                    | 26804.9936                     |
| PSRP2        | 21665.1767                    | 21664.9174                     |
| PSRP3        | 13794.1311                    | 13794.2758                     |
| PSRP4        | 5173.83854                    | 5173.31343                     |
| S01          | 40428.065                     | 40428.2026                     |
| S02          | 26564.8581                    | 26606.9096                     |
| S03          | 24796.9375                    | 24796.4526                     |
| S04          | 23279.2362                    | 23279.1049                     |
| S05          | 27630.4925                    | 27689.2065                     |
| S06          | 14559.6936                    | 14559.604                      |
| S07          | 17210.0237                    | 17209.9409                     |
| S08          | 15368.0045                    | 15367.7856                     |
| S09          | 17063.7765                    | 17105.644                      |
| S10          | 15211.6267                    | 15211.2817                     |
| S11          | 14766.2775                    | 14766.7114                     |
| S12          | 13632.9913                    | 13632.9243                     |
| S13          | 14536.9833                    | 14536.7133                     |
| S14          | 11649.5426                    | 11712.6928                     |
| S15          | 10753.6981                    | 10752.8725                     |
| S16          | 10434.2099                    | 10433.434                      |
| S17          | 12171.0565                    | 12170.4614                     |
| S18          | 12053.0759                    | 12052.5854                     |
| S19          | 10477.2435                    | 10476.6704                     |
| S20          | 12918.9543                    | 12918.7045                     |
| S21          | 12154.5883                    | 12154.1176                     |
| 16S rRNA     | 483683.2                      |                                |
| <b>Σ</b>     |                               | <b>908982.7</b>                |



**Table S4. Theoretical and experimental masses of protein and rRNA subunits constituting So50S ribosomal particles, related to Table 1.**

Experimental masses were previously determined through top-down LC-MS/MS analysis as reported by Van de Waterbeemd et al. (Van De Waterbeemd et al., 2018)

| Protein name | Theoretical average mass (Da) | Experimental average mass (Da) |
|--------------|-------------------------------|--------------------------------|
| L01          | 30443.1855                    | 30443.1855                     |
| L02          | 29661.2464                    | 29661.2464                     |
| L03          | 24074.2279                    | 24074.2279                     |
| L04          | 27163.7                       | 27225.7281                     |
| L05          | 24210.1445                    | 24210.1445                     |
| L06          | 20226.5493                    | 20226.5493                     |
| L09          | 17635.9005                    | 17635.9005                     |
| L10          | 20310.5897                    | 20310.5897                     |
| L11          | 16667.8094                    | 16667.8094                     |
| L12          | 13814.7232                    | 13814.7232                     |
| L13          | 23361.9846                    | 23361.9846                     |
| L14          | 13464.7332                    | 13464.7332                     |
| L15          | 22329.6623                    | 22329.662                      |
| L16          | 15297.9925                    | 15297.9925                     |
| L17          | 13434.8045                    | 13434.8045                     |
| L18          | 13701.7866                    | 13701.7866                     |
| L19          | 17566.343                     | 17566.343                      |
| L20          | 15557.3818                    | 15557.3818                     |
| L21          | 22562.8355                    | 22763.0298                     |
| L22          | 23114.3406                    | 23245.5332                     |
| L23          | 13553.8013                    | 13553.801                      |
| L24          | 16408.0505                    | 16408.0505                     |
| L27          | 14058.222                     | 14058.222                      |
| L28          | 8992.59724                    | 8992.59724                     |
| L29          | 12972.172                     | 12972.172                      |
| L31          | 10781.4944                    | 10781.4944                     |
| L32          | 6503.73784                    | 6503.73784                     |
| L33          | 7516.84534                    | 7516.84534                     |
| L34          | 6768.04684                    | 6768.04684                     |
| L35          | 8433.06514                    | 8433.06514                     |
| L36          | 4401.39584                    | 4401.39584                     |
| PSRP5        | 9255.03074                    | 9255.03074                     |
| PSRP6        | 7387.27114                    | 7387.27114                     |
| RRF          | 21837.9905                    | 21837.9905                     |
| 23S rRNA     | 911551                        |                                |
| 5S rRNA      | 39219.2                       |                                |
| 4S rRNA      | 34539.2                       |                                |
| <b>Σ</b>     |                               | <b>1539172</b>                 |

**Table S5. Masses and number of particles determined for ribosomal particles using the single-particle approaches, Orbitrap-based CDMS and MP, related to Figures 2, 3, and 4.**

Counts normalized column represents fractions of total particle counts that were quantified for specific peaks.

| Method | Sample | Particle name | Theoretical mass (kDa) | Mass from KDE (kDa) | FWHM (kDa) | Mean mass of the Gaussian fit (kDa) | Standard deviation of the Gaussian fit (kDa) | Counts normalized (%) | Counts (peak) | Counts (total) | Collection time (min) |
|--------|--------|---------------|------------------------|---------------------|------------|-------------------------------------|----------------------------------------------|-----------------------|---------------|----------------|-----------------------|
| CDMS   | Hs40S  | Hs40S         | 1214                   | 1217                | 140        | 1215                                | 48                                           | 47                    | 3737          | 7951           | 17                    |
|        |        | Hs40S         | 1214                   | 1215                | 358        | 1210                                | 117                                          | 19                    | 6477          |                |                       |
|        | Hs80S  | Hs60S         | 2633                   | 2361                | 362        | 2367                                | 149                                          | 56                    | 19010         | 34123          | 31                    |
|        |        | Hs80S         | 3847                   | 3890                | 420        | 3867                                | 163                                          | 11                    | 3751          |                |                       |
|        | So70S  | So30S         | 909                    | 802                 | 198        | 805                                 | 72                                           | 32                    | 30092         | 92703          | 41                    |
|        |        | So50S         | 1539                   | 1239                | 348        | 1238                                | 128                                          | 37                    | 34187         |                |                       |
|        | So70S  | 2448          | 2380                   | 228                 | 2381       | 88                                  | 20                                           | 18730                 |               |                |                       |
| MP     | Hs40S  | Hs40S         | 1214                   | 1226                | 312        | 1211                                | 110                                          | 82                    | 1000          | 1218           | 5                     |
|        |        | Hs40S         | 1214                   | 1217                | 480        | 1215                                | 109                                          | 25                    | 141           |                |                       |
|        | Hs80S  | Hs60S         | 2633                   | 2485                | 622        | 2491                                | 224                                          | 50                    | 284           | 573            | 5                     |
|        |        | Hs80S         | 3847                   | 3805                | 1017       | 3830                                | 311                                          | 19                    | 111           |                |                       |
|        | So70S  | So30S         | 909                    | 850                 | 339        | 848                                 | 111                                          | 25                    | 213           | 844            | 5                     |
|        |        | So50S         | 1539                   | 1475                | 473        | 1483                                | 158                                          | 25                    | 212           |                |                       |
|        | So70S  | 2448          | 2403                   | 640                 | 2344       | 209                                 | 45                                           | 377                   |               |                |                       |
